# Supplementary material
Source: MDPI journal article supplement (https://www.mdpi.com/2073-4352/13/4/658)

## checkCIF/PLATON report

Structure factors have been supplied for datablock(s) im\_1\_1

THIS REPORT IS FOR GUIDANCE ONLY. IF USED AS PART OF A REVIEW PROCEDURE FOR PUBLICATION, IT SHOULD NOT REPLACE THE EXPERTISE OF AN EXPERIENCED CRYSTALLOGRAPHIC REFEREE.

No syntax errors found.      CIF dictionary      Interpreting this report

### Datablock: im\_1\_1

---

|                        |                              |                                  |
|------------------------|------------------------------|----------------------------------|
| Bond precision:        | C-C = 0.0065 A               | Wavelength=0.71073               |
| Cell:                  | a=12.5362 (4)                | b=12.9887 (4)      c=17.3319 (8) |
|                        | alpha=90                     | beta=98.597 (4)      gamma=90    |
| Temperature:           | 150 K                        |                                  |
|                        | Calculated                   | Reported                         |
| Volume                 | 2790.43 (18)                 | 2790.44 (18)                     |
| Space group            | P 21/n                       | P 1 21/n 1                       |
| Hall group             | -P 2yn                       | -P 2yn                           |
| Moiety formula         | C16 H36 N, C3 H4 Br4 N3 O Re | C3 H4 Br4 N3 O Re, C16 H36 N     |
| Sum formula            | C19 H40 Br4 N4 O Re          | C19 H40 Br4 N4 O Re              |
| Mr                     | 846.36                       | 846.39                           |
| Dx, g cm <sup>-3</sup> | 2.015                        | 2.015                            |
| Z                      | 4                            | 4                                |
| Mu (mm <sup>-1</sup> ) | 10.099                       | 10.099                           |
| F000                   | 1620.0                       | 1620.0                           |
| F000'                  | 1612.67                      |                                  |
| h, k, lmax             | 16, 17, 23                   | 16, 17, 22                       |
| Nref                   | 6896                         | 6336                             |
| Tmin, Tmax             | 0.488, 0.731                 | 0.591, 0.774                     |
| Tmin'                  | 0.437                        |                                  |

Correction method= # Reported T Limits: Tmin=0.591 Tmax=0.774  
AbsCorr = GAUSSIAN

Data completeness= 0.919      Theta(max)= 28.238

|                                |                                  |
|--------------------------------|----------------------------------|
| R(reflections)= 0.0337 ( 4976) | wR2(reflections)= 0.0459 ( 6336) |
| S = 0.975                      | Npar= 266                        |



---

The following ALERTS were generated. Each ALERT has the format  
**test-name\_ALERT\_alert-type\_alert-level.**

Click on the hyperlinks for more details of the test.

---

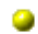

#### **Alert level C**

|                   |                                                 |              |
|-------------------|-------------------------------------------------|--------------|
| PLAT042_ALERT_1_C | Calc. and Reported MoietyFormula Strings Differ | Please Check |
| PLAT906_ALERT_3_C | Large K Value in the Analysis of Variance ..... | 2.733 Check  |
| PLAT977_ALERT_2_C | Check Negative Difference Density on H32A .     | -0.39 eA-3   |

---

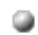

#### **Alert level G**

|                   |                                                  |          |
|-------------------|--------------------------------------------------|----------|
| PLAT007_ALERT_5_G | Number of Unrefined Donor-H Atoms .....          | 1 Report |
| PLAT912_ALERT_4_G | Missing # of FCF Reflections Above STh/L= 0.600  | 558 Note |
| PLAT941_ALERT_3_G | Average HKL Measurement Multiplicity .....       | 3.4 Low  |
| PLAT978_ALERT_2_G | Number C-C Bonds with Positive Residual Density. | 0 Info   |

---

- 0 **ALERT level A** = Most likely a serious problem - resolve or explain  
0 **ALERT level B** = A potentially serious problem, consider carefully  
3 **ALERT level C** = Check. Ensure it is not caused by an omission or oversight  
4 **ALERT level G** = General information/check it is not something unexpected

- 1 ALERT type 1 CIF construction/syntax error, inconsistent or missing data  
2 ALERT type 2 Indicator that the structure model may be wrong or deficient  
2 ALERT type 3 Indicator that the structure quality may be low  
1 ALERT type 4 Improvement, methodology, query or suggestion  
1 ALERT type 5 Informative message, check
- 
-



It is advisable to attempt to resolve as many as possible of the alerts in all categories. Often the minor alerts point to easily fixed oversights, errors and omissions in your CIF or refinement strategy, so attention to these fine details can be worthwhile. In order to resolve some of the more serious problems it may be necessary to carry out additional measurements or structure refinements. However, the purpose of your study may justify the reported deviations and the more serious of these should normally be commented upon in the discussion or experimental section of a paper or in the "special\_details" fields of the CIF. checkCIF was carefully designed to identify outliers and unusual parameters, but every test has its limitations and alerts that are not important in a particular case may appear. Conversely, the absence of alerts does not guarantee there are no aspects of the results needing attention. It is up to the individual to critically assess their own results and, if necessary, seek expert advice.

### **Publication of your CIF in IUCr journals**

A basic structural check has been run on your CIF. These basic checks will be run on all CIFs submitted for publication in IUCr journals (*Acta Crystallographica*, *Journal of Applied Crystallography*, *Journal of Synchrotron Radiation*); however, if you intend to submit to *Acta Crystallographica Section C* or *E* or *IUCrData*, you should make sure that **full publication checks** are run on the final version of your CIF prior to submission.

### **Publication of your CIF in other journals**

Please refer to the *Notes for Authors* of the relevant journal for any special instructions relating to CIF submission.







## checkCIF/PLATON report

Structure factors have been supplied for datablock(s) hpz

THIS REPORT IS FOR GUIDANCE ONLY. IF USED AS PART OF A REVIEW PROCEDURE FOR PUBLICATION, IT SHOULD NOT REPLACE THE EXPERTISE OF AN EXPERIENCED CRYSTALLOGRAPHIC REFEREE.

No syntax errors found.      CIF dictionary      Interpreting this report

### Datablock: hpz

---

Bond precision:      C-C = 0.0071 Å      Wavelength=0.71073

Cell:                      a=12.621 (2)              b=12.784 (2)              c=18.410 (4)  
                                alpha=90              beta=99.546 (5)              gamma=90

Temperature:              293 K

|                        | Calculated                   | Reported                     |
|------------------------|------------------------------|------------------------------|
| Volume                 | 2929.3 (9)                   | 2929.3 (10)                  |
| Space group            | P 21/n                       | P 1 21/n 1                   |
| Hall group             | -P 2yn                       | -P 2yn                       |
| Moiety formula         | C16 H36 N, C3 H4 Br4 N3 O Re | C3 H4 Br4 N3 O Re, C16 H36 N |
| Sum formula            | C19 H40 Br4 N4 O Re          | C19 H40 Br4 N4 O Re          |
| Mr                     | 846.36                       | 846.39                       |
| Dx, g cm <sup>-3</sup> | 1.919                        | 1.919                        |
| Z                      | 4                            | 4                            |
| Mu (mm <sup>-1</sup> ) | 9.621                        | 9.621                        |
| F000                   | 1620.0                       | 1620.0                       |
| F000'                  | 1612.67                      |                              |
| h, k, lmax             | 16, 16, 23                   | 16, 16, 23                   |
| Nref                   | 6312                         | 6293                         |
| Tmin, Tmax             | 0.157, 0.477                 | 0.532, 0.745                 |
| Tmin'                  | 0.049                        |                              |

Correction method= # Reported T Limits: Tmin=0.532 Tmax=0.745  
AbsCorr = MULTI-SCAN

Data completeness= 0.997              Theta(max)= 26.872

R(reflections)= 0.0264 ( 4831)

wR2(reflections)=  
0.0494 ( 6293)

S = 1.039

Npar= 264



---

The following ALERTS were generated. Each ALERT has the format

**test-name\_ALERT\_alert-type\_alert-level.**

Click on the hyperlinks for more details of the test.

---

### Alert level C

|                   |                                                  |              |
|-------------------|--------------------------------------------------|--------------|
| PLAT042_ALERT_1_C | Calc. and Reported MoietyFormula Strings Differ  | Please Check |
| PLAT220_ALERT_2_C | NonSolvent Resd 1 C Ueq(max)/Ueq(min) Range      | 3.7 Ratio    |
| PLAT222_ALERT_3_C | NonSolvent Resd 1 H Uiso(max)/Uiso(min) Range    | 4.6 Ratio    |
| PLAT234_ALERT_4_C | Large Hirshfeld Difference C32 --C33             | 0.16 Ang.    |
| PLAT234_ALERT_4_C | Large Hirshfeld Difference C33 --C34             | 0.20 Ang.    |
| PLAT234_ALERT_4_C | Large Hirshfeld Difference C2 --C4               | 0.16 Ang.    |
| PLAT242_ALERT_2_C | Low 'MainMol' Ueq as Compared to Neighbors of    | Rel Check    |
| PLAT360_ALERT_2_C | Short C(sp3)-C(sp3) Bond C33 - C34               | 1.35 Ang.    |
| PLAT910_ALERT_3_C | Missing # of FCF Reflection(s) Below Theta(Min). | 8 Note       |

---

### Alert level G

|                   |                                                  |           |
|-------------------|--------------------------------------------------|-----------|
| PLAT007_ALERT_5_G | Number of Unrefined Donor-H Atoms .....          | 1 Report  |
| PLAT199_ALERT_1_G | Reported _cell_measurement_temperature ..... (K) | 293 Check |
| PLAT200_ALERT_1_G | Reported _diffrn_ambient_temperature ..... (K)   | 293 Check |
| PLAT912_ALERT_4_G | Missing # of FCF Reflections Above STh/L= 0.600  | 11 Note   |
| PLAT913_ALERT_3_G | Missing # of Very Strong Reflections in FCF .... | 1 Note    |
| PLAT978_ALERT_2_G | Number C-C Bonds with Positive Residual Density. | 0 Info    |

---

- 0 **ALERT level A** = Most likely a serious problem - resolve or explain  
0 **ALERT level B** = A potentially serious problem, consider carefully  
9 **ALERT level C** = Check. Ensure it is not caused by an omission or oversight  
6 **ALERT level G** = General information/check it is not something unexpected

- 3 ALERT type 1 CIF construction/syntax error, inconsistent or missing data  
4 ALERT type 2 Indicator that the structure model may be wrong or deficient  
3 ALERT type 3 Indicator that the structure quality may be low  
4 ALERT type 4 Improvement, methodology, query or suggestion  
1 ALERT type 5 Informative message, check
- 
-



It is advisable to attempt to resolve as many as possible of the alerts in all categories. Often the minor alerts point to easily fixed oversights, errors and omissions in your CIF or refinement strategy, so attention to these fine details can be worthwhile. In order to resolve some of the more serious problems it may be necessary to carry out additional measurements or structure refinements. However, the purpose of your study may justify the reported deviations and the more serious of these should normally be commented upon in the discussion or experimental section of a paper or in the "special\_details" fields of the CIF. checkCIF was carefully designed to identify outliers and unusual parameters, but every test has its limitations and alerts that are not important in a particular case may appear. Conversely, the absence of alerts does not guarantee there are no aspects of the results needing attention. It is up to the individual to critically assess their own results and, if necessary, seek expert advice.

### **Publication of your CIF in IUCr journals**

A basic structural check has been run on your CIF. These basic checks will be run on all CIFs submitted for publication in IUCr journals (*Acta Crystallographica*, *Journal of Applied Crystallography*, *Journal of Synchrotron Radiation*); however, if you intend to submit to *Acta Crystallographica Section C* or *E* or *IUCrData*, you should make sure that **full publication checks** are run on the final version of your CIF prior to submission.

### **Publication of your CIF in other journals**

Please refer to the *Notes for Authors* of the relevant journal for any special instructions relating to CIF submission.



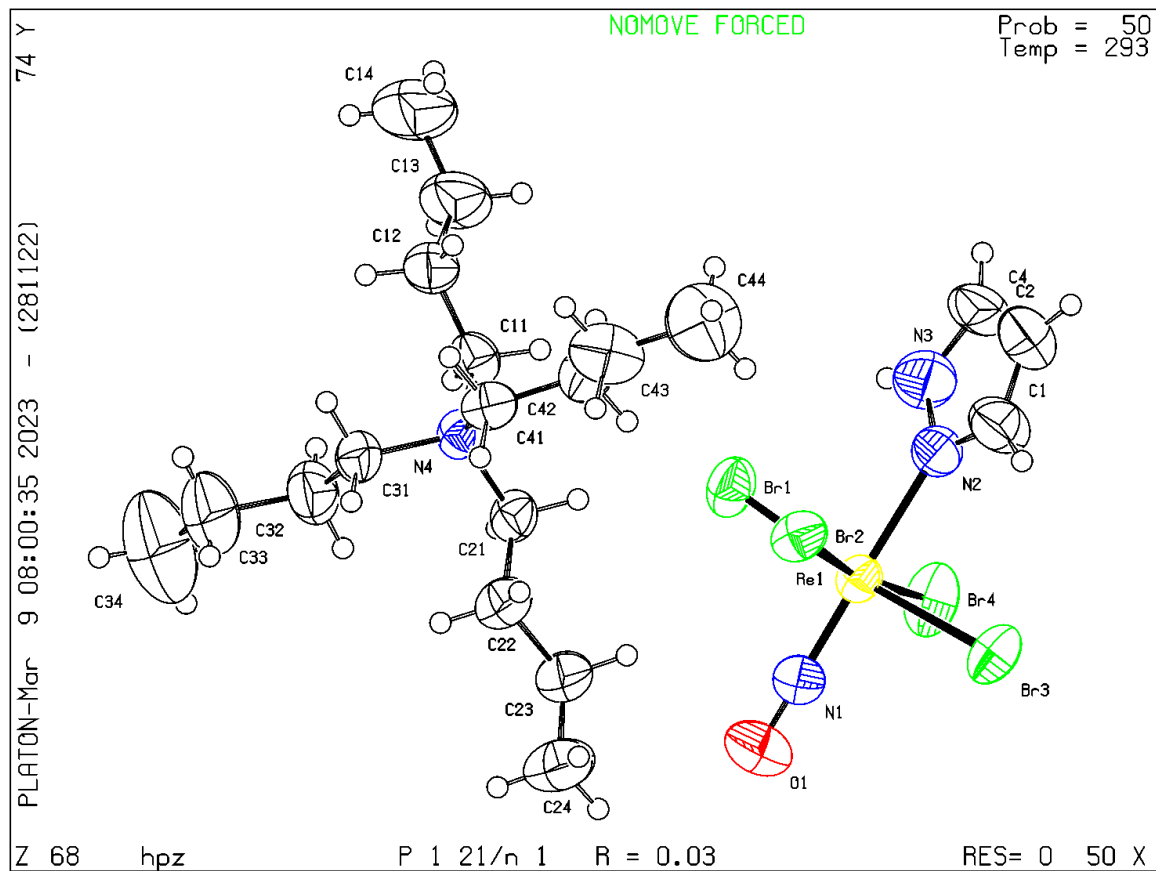



## checkCIF/PLATON report

Structure factors have been supplied for datablock(s) tri\_1\_2

THIS REPORT IS FOR GUIDANCE ONLY. IF USED AS PART OF A REVIEW PROCEDURE FOR PUBLICATION, IT SHOULD NOT REPLACE THE EXPERTISE OF AN EXPERIENCED CRYSTALLOGRAPHIC REFEREE.

No syntax errors found.      CIF dictionary      Interpreting this report

### Datablock: tri\_1\_2

---

|                        |                              |                                |
|------------------------|------------------------------|--------------------------------|
| Bond precision:        | C-C = 0.0063 Å               | Wavelength=0.71073             |
| Cell:                  | a=12.5889(2)                 | b=12.8366(2)      c=17.3631(5) |
|                        | alpha=90                     | beta=98.6314(19)      gamma=90 |
| Temperature:           | 150 K                        |                                |
|                        | Calculated                   | Reported                       |
| Volume                 | 2774.08(10)                  | 2774.06(10)                    |
| Space group            | P 21/n                       | P 1 21/n 1                     |
| Hall group             | -P 2yn                       | -P 2yn                         |
| Moiety formula         | C16 H36 N, C2 H3 Br4 N4 O Re | C2 H3 Br4 N4 O Re, C16 H36 N   |
| Sum formula            | C18 H39 Br4 N5 O Re          | C18 H39 Br4 N5 O Re            |
| Mr                     | 847.35                       | 847.38                         |
| Dx, g cm <sup>-3</sup> | 2.029                        | 2.029                          |
| Z                      | 4                            | 4                              |
| Mu (mm <sup>-1</sup> ) | 10.160                       | 10.160                         |
| F000                   | 1620.0                       | 1620.0                         |
| F000'                  | 1612.66                      |                                |
| h, k, lmax             | 16, 17, 23                   | 15, 16, 21                     |
| Nref                   | 6901                         | 6188                           |
| Tmin, Tmax             | 0.171, 0.444                 | 0.143, 0.473                   |
| Tmin'                  | 0.050                        |                                |

Correction method= # Reported T Limits: Tmin=0.143 Tmax=0.473  
AbsCorr = GAUSSIAN

Data completeness= 0.897      Theta(max)= 28.310

|                               |                                 |
|-------------------------------|---------------------------------|
| R(reflections)= 0.0299( 5178) | wR2(reflections)= 0.0587( 6188) |
| S = 1.046                     | Npar= 252                       |



---

The following ALERTS were generated. Each ALERT has the format

**test-name\_ALERT\_alert-type\_alert-level.**

Click on the hyperlinks for more details of the test.

---



#### **Alert level C**

|                   |                                                 |              |
|-------------------|-------------------------------------------------|--------------|
| PLAT042_ALERT_1_C | Calc. and Reported MoietyFormula Strings Differ | Please Check |
| PLAT971_ALERT_2_C | Check Calcd Resid. Dens. 0.21Ang From C1        | 1.55 eA-3    |
| PLAT977_ALERT_2_C | Check Negative Difference Density on H3         | -0.52 eA-3   |
| PLAT977_ALERT_2_C | Check Negative Difference Density on H13B       | -0.31 eA-3   |
| PLAT977_ALERT_2_C | Check Negative Difference Density on H23A       | -0.33 eA-3   |

---

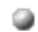

#### **Alert level G**

|                   |                                                  |          |
|-------------------|--------------------------------------------------|----------|
| PLAT007_ALERT_5_G | Number of Unrefined Donor-H Atoms .....          | 1 Report |
| PLAT164_ALERT_4_G | Nr. of Refined C-H H-Atoms in Heavy-Atom Struct. | 1 Note   |
| PLAT171_ALERT_4_G | The CIF-Embedded .res File Contains EADP Records | 1 Report |
| PLAT912_ALERT_4_G | Missing # of FCF Reflections Above STh/L= 0.600  | 594 Note |
| PLAT933_ALERT_2_G | Number of HKL-OMIT Records in Embedded .res File | 1 Note   |
| PLAT941_ALERT_3_G | Average HKL Measurement Multiplicity .....       | 1.8 Low  |
| PLAT952_ALERT_5_G | Calculated (ThMax) and CIF-Reported Lmax Differ. | 2 Units  |
| PLAT958_ALERT_1_G | Calculated (ThMax) and Actual (FCF) Lmax Differ. | 2 Units  |
| PLAT978_ALERT_2_G | Number C-C Bonds with Positive Residual Density. | 1 Info   |

---

- 0 **ALERT level A** = Most likely a serious problem - resolve or explain  
0 **ALERT level B** = A potentially serious problem, consider carefully  
5 **ALERT level C** = Check. Ensure it is not caused by an omission or oversight  
9 **ALERT level G** = General information/check it is not something unexpected

- 2 ALERT type 1 CIF construction/syntax error, inconsistent or missing data  
6 ALERT type 2 Indicator that the structure model may be wrong or deficient  
1 ALERT type 3 Indicator that the structure quality may be low  
3 ALERT type 4 Improvement, methodology, query or suggestion  
2 ALERT type 5 Informative message, check
- 
-



It is advisable to attempt to resolve as many as possible of the alerts in all categories. Often the minor alerts point to easily fixed oversights, errors and omissions in your CIF or refinement strategy, so attention to these fine details can be worthwhile. In order to resolve some of the more serious problems it may be necessary to carry out additional measurements or structure refinements. However, the purpose of your study may justify the reported deviations and the more serious of these should normally be commented upon in the discussion or experimental section of a paper or in the "special\_details" fields of the CIF. checkCIF was carefully designed to identify outliers and unusual parameters, but every test has its limitations and alerts that are not important in a particular case may appear. Conversely, the absence of alerts does not guarantee there are no aspects of the results needing attention. It is up to the individual to critically assess their own results and, if necessary, seek expert advice.

### **Publication of your CIF in IUCr journals**

A basic structural check has been run on your CIF. These basic checks will be run on all CIFs submitted for publication in IUCr journals (*Acta Crystallographica*, *Journal of Applied Crystallography*, *Journal of Synchrotron Radiation*); however, if you intend to submit to *Acta Crystallographica Section C* or *E* or *IUCrData*, you should make sure that **full publication checks** are run on the final version of your CIF prior to submission.

### **Publication of your CIF in other journals**

Please refer to the *Notes for Authors* of the relevant journal for any special instructions relating to CIF submission.



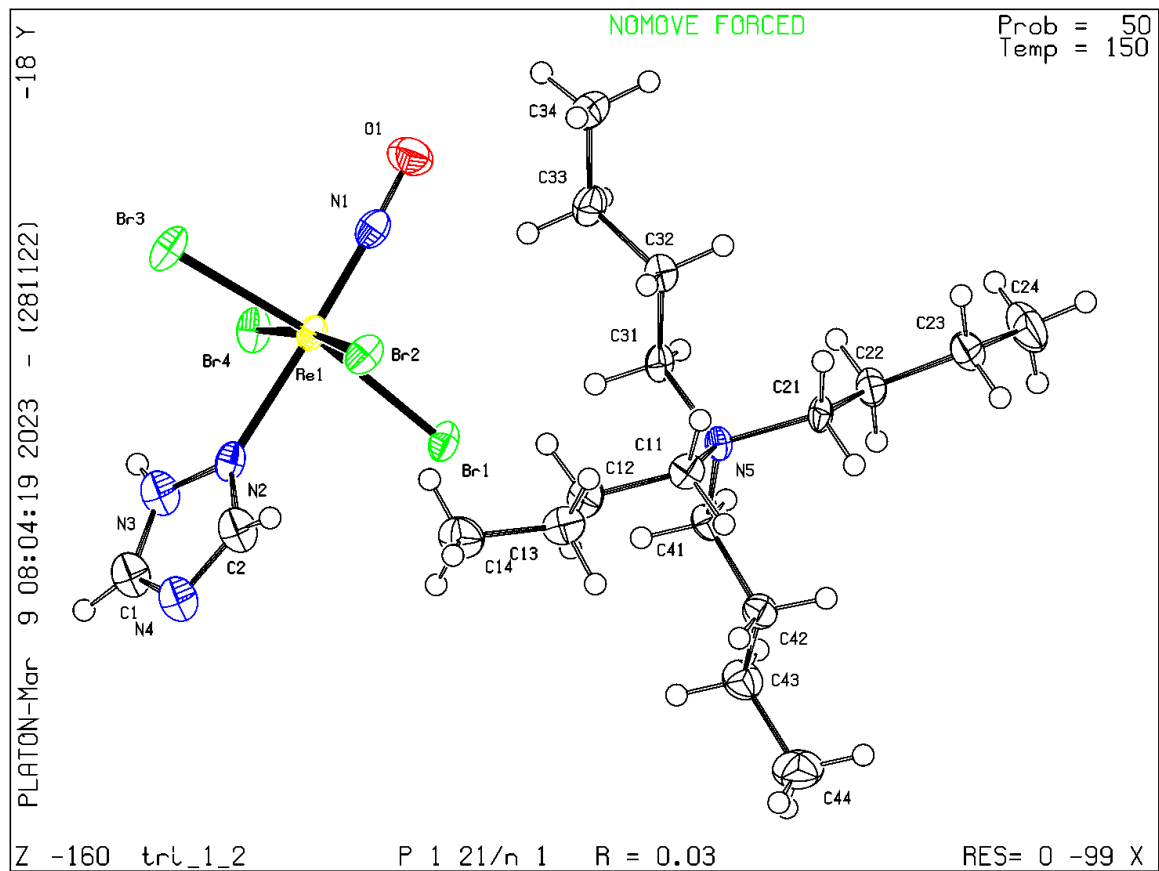







---

The following ALERTS were generated. Each ALERT has the format

**test-name\_ALERT\_alert-type\_alert-level.**

Click on the hyperlinks for more details of the test.

---

#### Alert level A

|                   |       |                     |      |         |   |             |
|-------------------|-------|---------------------|------|---------|---|-------------|
| PLAT410_ALERT_2_A | Short | Intra H...H Contact | H51A | ..H71A  | . | 1.67 Ang.   |
|                   |       |                     |      | x,y,z = |   | 1_555 Check |
| PLAT410_ALERT_2_A | Short | Intra H...H Contact | H51B | ..H81B  | . | 1.58 Ang.   |
|                   |       |                     |      | x,y,z = |   | 1_555 Check |
| PLAT410_ALERT_2_A | Short | Intra H...H Contact | H52A | ..H53A  | . | 1.79 Ang.   |
|                   |       |                     |      | x,y,z = |   | 1_555 Check |
| PLAT410_ALERT_2_A | Short | Intra H...H Contact | H61A | ..H81A  | . | 1.63 Ang.   |
|                   |       |                     |      | x,y,z = |   | 1_555 Check |
| PLAT410_ALERT_2_A | Short | Intra H...H Contact | H61B | ..H71B  | . | 1.62 Ang.   |
|                   |       |                     |      | x,y,z = |   | 1_555 Check |

---

#### Alert level B

|                   |       |                             |                                 |         |         |             |
|-------------------|-------|-----------------------------|---------------------------------|---------|---------|-------------|
| PLAT241_ALERT_2_B | High  | 'MainMol'                   | Ueq as Compared to Neighbors of |         | C62     | Check       |
| PLAT241_ALERT_2_B | High  | 'MainMol'                   | Ueq as Compared to Neighbors of |         | C71     | Check       |
| PLAT241_ALERT_2_B | High  | 'MainMol'                   | Ueq as Compared to Neighbors of |         | C81     | Check       |
| PLAT242_ALERT_2_B | Low   | 'MainMol'                   | Ueq as Compared to Neighbors of |         | N2      | Check       |
| PLAT242_ALERT_2_B | Low   | 'MainMol'                   | Ueq as Compared to Neighbors of |         | C53     | Check       |
| PLAT242_ALERT_2_B | Low   | 'MainMol'                   | Ueq as Compared to Neighbors of |         | C63     | Check       |
| PLAT242_ALERT_2_B | Low   | 'MainMol'                   | Ueq as Compared to Neighbors of |         | C73     | Check       |
| PLAT242_ALERT_2_B | Low   | 'MainMol'                   | Ueq as Compared to Neighbors of |         | C83     | Check       |
| PLAT342_ALERT_3_B | Low   | Bond Precision on C-C Bonds | .....                           |         | 0.02183 | Ang.        |
| PLAT360_ALERT_2_B | Short | C(sp3)-C(sp3) Bond          | C51 - C52                       | .       | 1.33    | Ang.        |
| PLAT360_ALERT_2_B | Short | C(sp3)-C(sp3) Bond          | C52 - C53                       | .       | 1.33    | Ang.        |
| PLAT360_ALERT_2_B | Short | C(sp3)-C(sp3) Bond          | C71 - C72                       | .       | 1.33    | Ang.        |
| PLAT360_ALERT_2_B | Short | C(sp3)-C(sp3) Bond          | C81 - C82                       | .       | 1.32    | Ang.        |
| PLAT360_ALERT_2_B | Short | C(sp3)-C(sp3) Bond          | C82 - C83                       | .       | 1.33    | Ang.        |
| PLAT362_ALERT_2_B | Short | C(sp3)-C(sp2) Bond          | C62 - C63                       | .       | 1.27    | Ang.        |
| PLAT410_ALERT_2_B | Short | Intra H...H Contact         | H82A                            | ..H83B  | .       | 1.80 Ang.   |
|                   |       |                             |                                 | x,y,z = |         | 1_555 Check |

---

#### Alert level C

|                   |                                          |                           |                                 |        |       |
|-------------------|------------------------------------------|---------------------------|---------------------------------|--------|-------|
| PLAT042_ALERT_1_C | Calc. and Reported MoietyFormula Strings | Differ                    |                                 | Please | Check |
| PLAT220_ALERT_2_C | NonSolvent Resd 2 C                      | Ueq(max)/Ueq(min) Range   |                                 | 4.4    | Ratio |
| PLAT222_ALERT_3_C | NonSolvent Resd 2 H                      | Uiso(max)/Uiso(min) Range |                                 | 5.5    | Ratio |
| PLAT234_ALERT_4_C | Large Hirshfeld Difference               | C62 --C63                 | .                               | 0.24   | Ang.  |
| PLAT234_ALERT_4_C | Large Hirshfeld Difference               | C63 --C64                 | .                               | 0.20   | Ang.  |
| PLAT234_ALERT_4_C | Large Hirshfeld Difference               | N15 --N16                 | .                               | 0.17   | Ang.  |
| PLAT241_ALERT_2_C | High                                     | 'MainMol'                 | Ueq as Compared to Neighbors of | C51    | Check |
| PLAT241_ALERT_2_C | High                                     | 'MainMol'                 | Ueq as Compared to Neighbors of | C52    | Check |
| PLAT241_ALERT_2_C | High                                     | 'MainMol'                 | Ueq as Compared to Neighbors of | C61    | Check |
| PLAT241_ALERT_2_C | High                                     | 'MainMol'                 | Ueq as Compared to Neighbors of | C72    | Check |
| PLAT241_ALERT_2_C | High                                     | 'MainMol'                 | Ueq as Compared to Neighbors of | C82    | Check |
| PLAT241_ALERT_2_C | High                                     | 'MainMol'                 | Ueq as Compared to Neighbors of | N15    | Check |
| PLAT241_ALERT_2_C | High                                     | 'MainMol'                 | Ueq as Compared to Neighbors of | N25    | Check |
| PLAT242_ALERT_2_C | Low                                      | 'MainMol'                 | Ueq as Compared to Neighbors of | C43    | Check |
| PLAT242_ALERT_2_C | Low                                      | 'MainMol'                 | Ueq as Compared to Neighbors of | Re1    | Check |
| PLAT242_ALERT_2_C | Low                                      | 'MainMol'                 | Ueq as Compared to Neighbors of | Re2    | Check |



|                   |                                                 |                                           |       |           |
|-------------------|-------------------------------------------------|-------------------------------------------|-------|-----------|
| PLAT242_ALERT_2_C | Low                                             | 'MainMol' Ueq as Compared to Neighbors of | N22   | Check     |
| PLAT260_ALERT_2_C | Large                                           | Average Ueq of Residue Including          | 0.159 | Check     |
| PLAT260_ALERT_2_C | Large                                           | Average Ueq of Residue Including          | 0.102 | Check     |
| PLAT360_ALERT_2_C | Short                                           | C(sp3)-C(sp3) Bond C61 - C62              | 1.34  | Ang.      |
| PLAT360_ALERT_2_C | Short                                           | C(sp3)-C(sp3) Bond C72 - C73              | 1.40  | Ang.      |
| PLAT360_ALERT_2_C | Short                                           | C(sp3)-C(sp3) Bond C73 - C74              | 1.38  | Ang.      |
| PLAT360_ALERT_2_C | Short                                           | C(sp3)-C(sp3) Bond C83 - C84              | 1.41  | Ang.      |
| PLAT410_ALERT_2_C | Short                                           | Intra H...H Contact H61A ..H62B           | 1.97  | Ang.      |
|                   |                                                 | x,y,z =                                   | 1_555 | Check     |
| PLAT410_ALERT_2_C | Short                                           | Intra H...H Contact H81B ..H82B           | 1.93  | Ang.      |
|                   |                                                 | x,y,z =                                   | 1_555 | Check     |
| PLAT790_ALERT_4_C | Centre of Gravity not Within Unit Cell: Resd. # |                                           | 1     | Note      |
|                   | C16 H35 N                                       |                                           |       |           |
| PLAT906_ALERT_3_C | Large                                           | K Value in the Analysis of Variance       | 9.321 | Check     |
| PLAT906_ALERT_3_C | Large                                           | K Value in the Analysis of Variance       | 2.461 | Check     |
| PLAT911_ALERT_3_C | Missing                                         | FCF Refl Between Thmin & STh/L=           | 0.600 | 65 Report |
| PLAT973_ALERT_2_C | Check                                           | Calcd Positive Resid. Density on          | 1.04  | eA-3      |
| PLAT973_ALERT_2_C | Check                                           | Calcd Positive Resid. Density on          | 1.02  | eA-3      |
| PLAT977_ALERT_2_C | Check                                           | Negative Difference Density on H23B       | -0.31 | eA-3      |
| PLAT977_ALERT_2_C | Check                                           | Negative Difference Density on H44B       | -0.34 | eA-3      |
| PLAT977_ALERT_2_C | Check                                           | Negative Difference Density on H72A       | -0.37 | eA-3      |
| PLAT977_ALERT_2_C | Check                                           | Negative Difference Density on H74A       | -0.34 | eA-3      |

### Alert level G

|                   |                                                  |       |           |
|-------------------|--------------------------------------------------|-------|-----------|
| PLAT002_ALERT_2_G | Number of Distance or Angle Restraints on AtSite | 12    | Note      |
| PLAT003_ALERT_2_G | Number of Uiso or Uij Restrained non-H Atoms ... | 12    | Report    |
| PLAT083_ALERT_2_G | SHELXL Second Parameter in WGHT Unusually Large  | 7.35  | Why ?     |
| PLAT172_ALERT_4_G | The CIF-Embedded .res File Contains DFIX Records | 6     | Report    |
| PLAT178_ALERT_4_G | The CIF-Embedded .res File Contains SIMU Records | 3     | Report    |
| PLAT187_ALERT_4_G | The CIF-Embedded .res File Contains RIGU Records | 5     | Report    |
| PLAT199_ALERT_1_G | Reported _cell_measurement_temperature           | 293   | Check     |
| PLAT200_ALERT_1_G | Reported _diffrn_ambient_temperature             | 293   | Check     |
| PLAT343_ALERT_2_G | Unusual sp3 Angle Range in Main Residue for      | C51   | Check     |
| PLAT343_ALERT_2_G | Unusual sp3 Angle Range in Main Residue for      | C52   | Check     |
| PLAT343_ALERT_2_G | Unusual sp3 Angle Range in Main Residue for      | C61   | Check     |
| PLAT343_ALERT_2_G | Unusual sp3 Angle Range in Main Residue for      | C62   | Check     |
| PLAT343_ALERT_2_G | Unusual sp3 Angle Range in Main Residue for      | C71   | Check     |
| PLAT343_ALERT_2_G | Unusual sp3 Angle Range in Main Residue for      | C72   | Check     |
| PLAT343_ALERT_2_G | Unusual sp3 Angle Range in Main Residue for      | C81   | Check     |
| PLAT343_ALERT_2_G | Unusual sp3 Angle Range in Main Residue for      | C82   | Check     |
| PLAT434_ALERT_2_G | Short Inter HL..HL Contact Br13 ..Br23           | 3.57  | Ang.      |
|                   | x,3/2-y,1/2+z =                                  | 4_576 | Check     |
| PLAT860_ALERT_3_G | Number of Least-Squares Restraints               | 135   | Note      |
| PLAT910_ALERT_3_G | Missing # of FCF Reflection(s) Below Theta(Min). | 1     | Note      |
| PLAT912_ALERT_4_G | Missing # of FCF Reflections Above STh/L=        | 0.600 | 1750 Note |
| PLAT933_ALERT_2_G | Number of HKL-OMIT Records in Embedded .res File | 24    | Note      |
| PLAT941_ALERT_3_G | Average HKL Measurement Multiplicity             | 2.0   | Low       |
| PLAT978_ALERT_2_G | Number C-C Bonds with Positive Residual Density. | 0     | Info      |

5 **ALERT level A** = Most likely a serious problem - resolve or explain  
 16 **ALERT level B** = A potentially serious problem, consider carefully  
 35 **ALERT level C** = Check. Ensure it is not caused by an omission or oversight  
 23 **ALERT level G** = General information/check it is not something unexpected

3 ALERT type 1 CIF construction/syntax error, inconsistent or missing data



60 ALERT type 2 Indicator that the structure model may be wrong or deficient  
8 ALERT type 3 Indicator that the structure quality may be low  
8 ALERT type 4 Improvement, methodology, query or suggestion  
0 ALERT type 5 Informative message, check

---

It is advisable to attempt to resolve as many as possible of the alerts in all categories. Often the minor alerts point to easily fixed oversights, errors and omissions in your CIF or refinement strategy, so attention to these fine details can be worthwhile. In order to resolve some of the more serious problems it may be necessary to carry out additional measurements or structure refinements. However, the purpose of your study may justify the reported deviations and the more serious of these should normally be commented upon in the discussion or experimental section of a paper or in the "special\_details" fields of the CIF. checkCIF was carefully designed to identify outliers and unusual parameters, but every test has its limitations and alerts that are not important in a particular case may appear. Conversely, the absence of alerts does not guarantee there are no aspects of the results needing attention. It is up to the individual to critically assess their own results and, if necessary, seek expert advice.

#### **Publication of your CIF in IUCr journals**

A basic structural check has been run on your CIF. These basic checks will be run on all CIFs submitted for publication in IUCr journals (*Acta Crystallographica*, *Journal of Applied Crystallography*, *Journal of Synchrotron Radiation*); however, if you intend to submit to *Acta Crystallographica Section C* or *E* or *IUCrData*, you should make sure that full publication checks are run on the final version of your CIF prior to submission.

#### **Publication of your CIF in other journals**

Please refer to the *Notes for Authors* of the relevant journal for any special instructions relating to CIF submission.

---

**PLATON version of 28/11/2022; check.def file version of 28/11/2022**



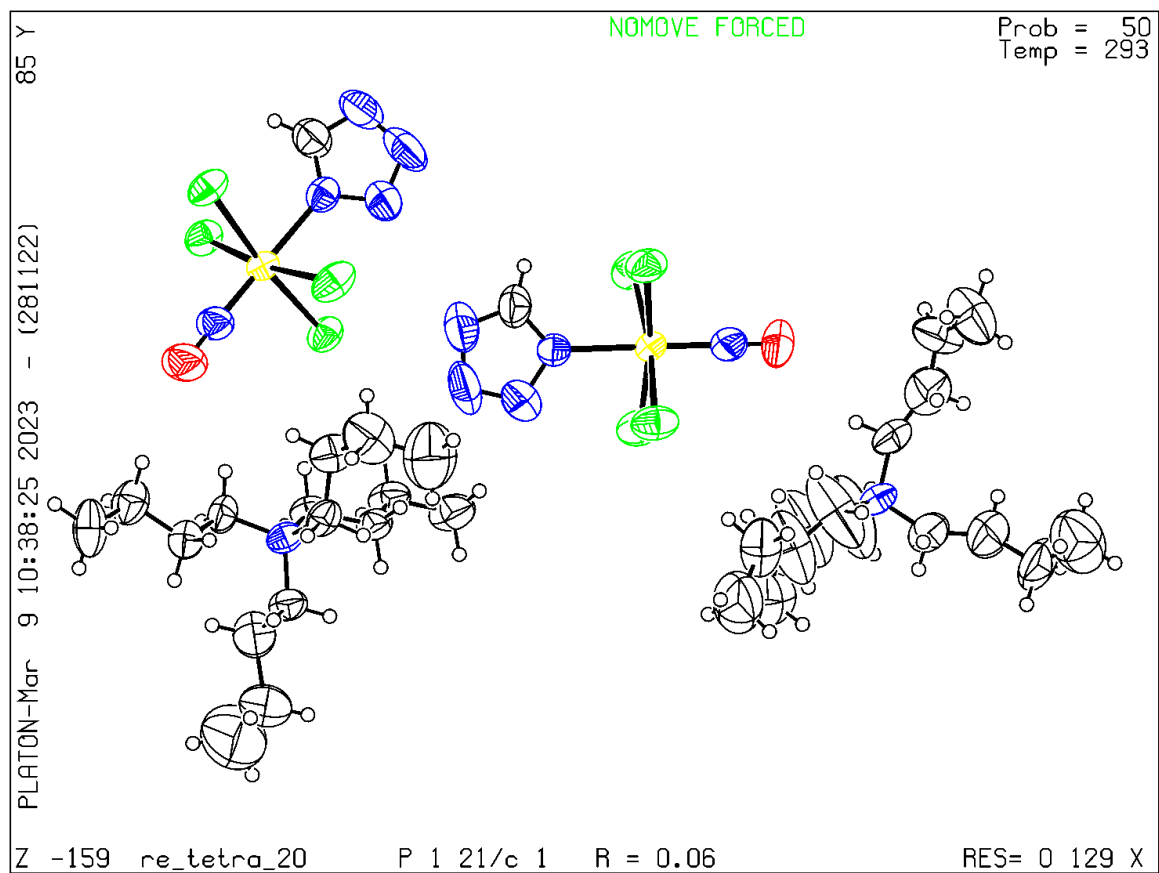

Supplement: s1 [file s1]
