# Supplementary material
Source: MDPI journal article supplement (https://www.mdpi.com/2073-4352/13/4/658)
Supplement: s1 [file s1]

## SUPPLEMENTARY MATERIALS

### Novel mononuclear tetrabromonitrosylrhenate(II) complexes containing azole-type ligands: magnetostructural characterization through Hirshfeld surfaces analysis

Mario Pacheco<sup>1\*</sup>, Javier González-Platas<sup>2</sup>, Carlos Kremer<sup>1</sup>, Miguel Julve<sup>3</sup>, Francesc Lloret<sup>3</sup> and Alicia Cuevas<sup>1</sup>

<sup>1</sup> Área de Química Inorgánica, Departamento Estrella Campos, Facultad de Química, Universidad de la República, Av. General Flores 2124, Montevideo, Uruguay

<sup>2</sup> Departamento de Física, Instituto Universitario de Estudios Avanzados en Física Atómica, Molecular y Fotónica (IUDEA), MALTA Consolider Team, Universidad de La Laguna, Avenida Astrofísico Fco. Sánchez s/n, La Laguna, Tenerife E-38204, Spain

<sup>3</sup> Instituto de Ciencia Molecular (ICMol)/Departamento de Química Inorgánica, Universidad de Valencia, C/ Catedrático José Beltrán 2, 46980 Paterna, Valencia, Spain

\* Correspondence: mpacheco@fq.edu.uy.

**Table S1.** List of the infrared absorption bands observed in compounds **1-4**, and classified upon their origin. (ligand, NBu<sub>4</sub><sup>+</sup> or Re-NO).

| Compound | Ligand (L)                                                                                                 | NBu <sub>4</sub> <sup>+</sup>                                             | Re-NO   | Ref  |
|----------|------------------------------------------------------------------------------------------------------------|---------------------------------------------------------------------------|---------|------|
| <b>1</b> | 3150(w), 3144(w), 1481(m), 1378(m), 1356(w), 1306(w), 1283(w), 1145(m), 1043(m), 997(m), 888(m) and 675(m) | 2962(m), 2923(m), 2873(m) and 1470(m)                                     | 1765(s) | [24] |
| <b>2</b> | 457(m), 1355(m), 1152(w), 1135(s), 1135(s), 773(s), 665(m), and 619(w)                                     | 2960(s), 2932(m), 2872(m), 1408(m), 1378(w), 1065(m), 1027(w), and 737(m) | 1769(s) | [25] |
| <b>3</b> | 3150(w), 3144(w), 1481(m), 1378(m), 1356(w), 1306(w), 1283(w), 1145(m), 1043(m), 997(m), 888(m) y 675(m)   | 2960(m), 2933 (w), 2871 (m), 1470 (m), and 738 (w)                        | 1769(s) | [24] |
| <b>4</b> | 3159(m), 1255(w), 1126(m), 1063(w), 1030(w), 881(w), 658(m)                                                | 2963(m), 2876(w), 1467(m) and 881(w)                                      | 1765(s) | [26] |

**Table S2.** Summary of the crystal data and structure refinement for **1-4**.<sup>a</sup>

| Compound          | <b>1</b>                                                           | <b>2</b>                                                           | <b>3</b>                                                           | <b>4</b>                                                                                       |
|-------------------|--------------------------------------------------------------------|--------------------------------------------------------------------|--------------------------------------------------------------------|------------------------------------------------------------------------------------------------|
| Empirical formula | C <sub>19</sub> H <sub>40</sub> Br <sub>4</sub> N <sub>4</sub> ORe | C <sub>19</sub> H <sub>40</sub> Br <sub>4</sub> N <sub>4</sub> ORe | C <sub>18</sub> H <sub>39</sub> Br <sub>4</sub> N <sub>5</sub> ORe | C <sub>34</sub> H <sub>76</sub> Br <sub>8</sub> N <sub>12</sub> O <sub>2</sub> Re <sub>2</sub> |
| Formula weight    | 846.39                                                             | 846.39                                                             | 847.38                                                             | 1695.74                                                                                        |
| T/K               | 150.01(10)                                                         | 293(2)                                                             | 149.99(10)                                                         | 293(2)                                                                                         |
| λ/Å               | 0.71073                                                            | 0.71073                                                            | 0.71073                                                            | 0.71073                                                                                        |
| Crystal system    | Monoclinic                                                         | Monoclinic                                                         | Monoclinic                                                         | Monoclinic                                                                                     |
| Space group       | <i>P</i> 2 <sub>1</sub> / <i>n</i>                                 | <i>P</i> 2 <sub>1</sub> / <i>n</i>                                 | <i>P</i> 2 <sub>1</sub> / <i>n</i>                                 | <i>P</i> 2 <sub>1</sub> / <i>c</i>                                                             |
| <i>a</i> /Å       | 12.5362(4)                                                         | 12.621(2)                                                          | 12.5889(2)                                                         | 24.5488(13)                                                                                    |
| <i>b</i> /Å       | 12.9887(4)                                                         | 12.784(2)                                                          | 12.8366(2)                                                         | 11.3909(4)                                                                                     |

|                                                                               |                                     |                                     |                                     |                                     |
|-------------------------------------------------------------------------------|-------------------------------------|-------------------------------------|-------------------------------------|-------------------------------------|
| $c / \text{\AA}$                                                              | 17.3319(8)                          | 18.410(4)                           | 17.3631(5)                          | 22.8263(13)                         |
| $\alpha / ^\circ$                                                             | 90                                  | 90                                  | 90                                  | 90                                  |
| $\beta / ^\circ$                                                              | 98.597(4)                           | 99.546(5)                           | 98.6314(19)                         | 115.424(7)                          |
| $\gamma / ^\circ$                                                             | 90                                  | 90                                  | 90                                  | 90                                  |
| Volume / $\text{\AA}^3$                                                       | 2790.44(18)                         | 2929.3(10)                          | 2774.06(10)                         | 5764.8(6)                           |
| $Z$                                                                           | 4                                   | 4                                   | 4                                   | 4                                   |
| $\rho_{\text{calcd}} / \text{g cm}^{-3}$                                      | 2.015                               | 1.919                               | 2.029                               | 1.954                               |
| Absorption<br>coefficient./m<br>$\text{m}^{-1}$                               | 10.099                              | 9.621                               | 10.160                              | 9.779                               |
| $F(000)$                                                                      | 1620                                | 1620                                | 1620                                | 3236                                |
| Crystal size<br>/ $\text{mm}^3$                                               | 0.081 x 0.06 x 0.031                | 0.305 x 0.168 x 0.077               | 0.286 x 0.152 x 0.08                | 0.126 x 0.091 x 0.032               |
| $\theta$ range for<br>data<br>collection/ $^\circ$                            | 1.878 to 28.238                     | 3.006 to 26.872                     | 1.871 to 28.310                     | 1.786 to 28.425                     |
| Index ranges                                                                  | $-8 \leq h \leq 16$                 | $-16 \leq h \leq 16$                | $-15 \leq h \leq 10$                | $-32 \leq h \leq 32$                |
|                                                                               | $-17 \leq k \leq 16$                | $-16 \leq k \leq 16$                | $-14 \leq k \leq 16$                | $-14 \leq k \leq 11$                |
|                                                                               | $-22 \leq l \leq 22$                | $-23 \leq l \leq 23$                | $-20 \leq l \leq 21$                | $-23 \leq l \leq 30$                |
| Reflect.<br>collected                                                         | 21285                               | 86900                               | 11248                               | 24758                               |
| Independent<br>reflect. [R(int)]                                              | 6336 [0.0499]                       | 6293 [0.0601]                       | 6188 [0.0221]                       | 12670 [0.0544]                      |
| Completeness<br>to $\theta = 25.242$<br>(1, 3 and 4) or<br>$26.000^\circ$ (2) | 100.00%                             | 99.80%                              | 100.00%                             | 99.4%                               |
| Absorption<br>correction                                                      | Gaussian                            | Semi-empirical from<br>equivalents  | Gaussian                            | Gaussian                            |
| Max./min.<br>transmission                                                     | 0.774/0.591                         | 0.745/0.532                         | 0.473/0.143                         | 0.836/0.443                         |
| Refinement<br>method                                                          | Full-matrix least-<br>squares on F2 |
| Data/restraints<br>/ parameters                                               | 6336/0/ 266                         | 6293/0/264                          | 6188/0/252                          | 12670/135/531                       |
| <sup>a</sup> Goodness-of-<br>fit on $F^2$                                     | 0.975                               | 1.040                               | 1.047                               | 1.204                               |
| <sup>b</sup> R <sub>1</sub> [ $I > 2\sigma(I)$ ]                              | 0.0337                              | 0.0264                              | 0.0299                              | 0.0673                              |
| <sup>b</sup> wR2 (all data)                                                   | 0.0459                              | 0.0495                              | 0.0588                              | 0.1768                              |
| Extinction<br>coefficient                                                     | n/a                                 | n/a                                 | n/a                                 | n/a                                 |
| Largest diff.<br>peak and hole/e<br>$\text{\AA}^{-3}$                         | 0.890 and -1.164                    | 0.538 and -0.670                    | 1.384 and -0.972                    | 1.418 and -0.904                    |

$$^a \text{Goodness-of-fit: } S = \sqrt{\frac{\sum [w(F_o^2 - F_c^2)^2]}{(N-P)}} \quad . \quad ^b R = \frac{\sum ||F_o| - |F_c||}{\sum |F_o|} \text{ and } wR2 = \sqrt{\frac{\sum [w(F_o^2 - F_c^2)^2]}{\sum [w(F_o^2)^2]}}$$

**Table S3.** Geometrical distortion from OC-6 calculated by CSM (OC-6) and the calculated tetragonal distortion for several tetrabromonitrosylrhenium(II) complexes.

| L =                           | OC-6  | dist (Re-N) / Å | $v = \Delta/\lambda\kappa$ | Ref       |
|-------------------------------|-------|-----------------|----------------------------|-----------|
| Pirazole                      | 1.397 | 2.191           | -2.28                      | This work |
| Imidazole                     | 1.460 | 2.173           | -1.94                      | This work |
| 1,2,4-triazole                | 1.369 | 2.194           | -1.55                      | This work |
| 1H-Tetrazole                  | 1.269 | 2.182           | -1.70                      | This work |
| Pyridine                      | 1.300 | 2.218           | -2.30                      | 9         |
| 3-Pyridinecarboxylic acid     | 1.266 | 2.225           | -1.88                      | 10        |
| 3,5-Pyridinedicarboxylic acid | 1.075 | 2.230           | -1.57                      | 11        |
| Pyrazine                      | 1.454 | 2.215           | -1.52                      | 9         |
| pyrimidine                    | 1.291 | 2.227           | -1.68                      | 9         |
| pyridazine                    | 1.275 | 2.234           | -1.85                      | 9         |

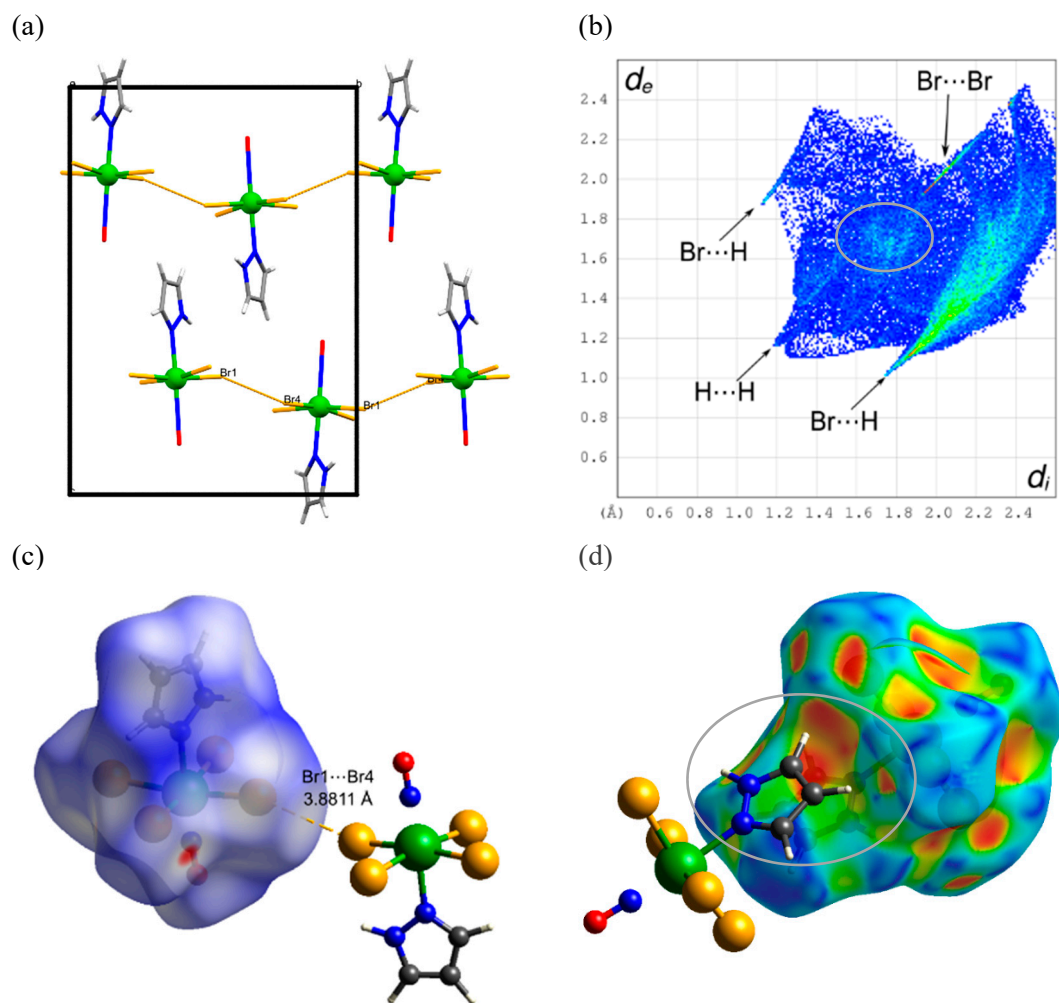

**Figure S1.** (a) Packing diagram down the crystallographic  $a$  axis, (b) fingerprint plot, (c)  $d_{\text{norm}}$  surface, and (d) shape index surface of the  $[\text{Re}(\text{NO})\text{Br}_4(\text{Hpz})]^-$  anionic units in **2**. Short  $\text{Br}\cdots\text{Br}$  (yellow dashed lines) contacts and  $\pi$ - $\pi$  stacking interactions (grey ovals) are shown.

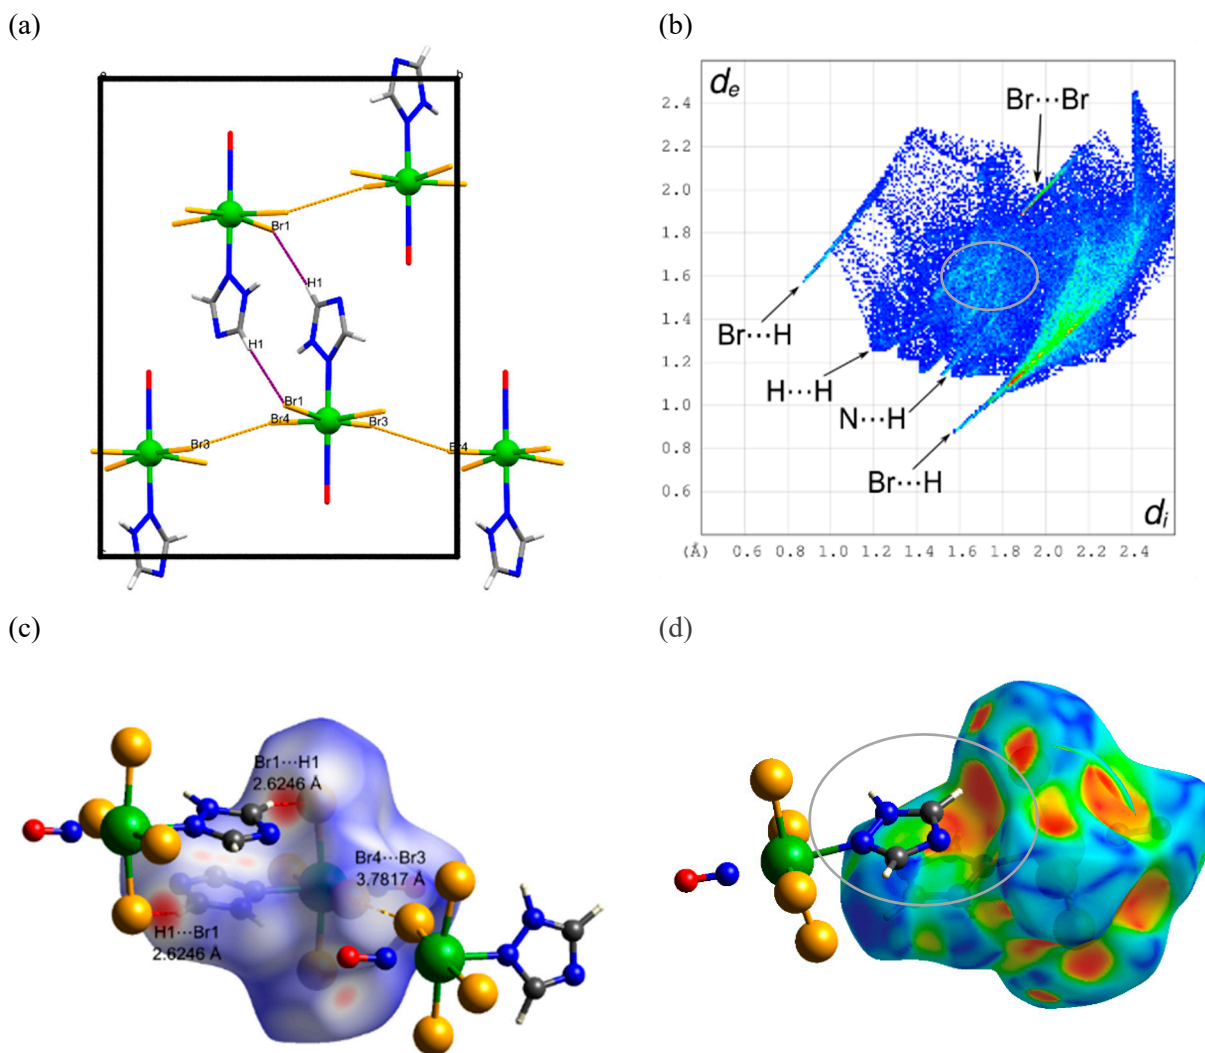

**Figure S2.** (a) Packing diagram down the crystallographic *a* axis, (b) fingerprint plot, (c) *d<sub>norm</sub>* surface, and (d) shape index surface of the [Re(NO)Br<sub>4</sub>(Htz)]<sup>-</sup> anionic units in **3**. Short Br...Br (yellow), Br...H (red) contacts and  $\pi$ - $\pi$  stacking interactions (grey ovals) are shown.

## References

- 24 AIST: Spectral Database for Organic Compounds, SDBS. Available online: [http://sdbs.db.aist.go.jp/sdbs/cgi-bin/cre\\_index.cgi](http://sdbs.db.aist.go.jp/sdbs/cgi-bin/cre_index.cgi) (accessed on 15 October 2016).
- 25 Nakamoto, K. Complexes of Alcoxides, Alcohols, Ethers, Ketones, Aldehydes, Esteres, and Carboxylic Acids. En: *Infrared and Raman Spectra of Inorganic and Coordination Compounds. In Part II: Applications in Coordination, Organometallic, and Bioinorganic*; John Wiley & Sons: Hoboken, NJ, USA, 1997.
- 26 Billes, F.; Endrédi, H.; Keresztury, G. Vibrational Spectroscopy of Triazoles and Tetrazole. *J. Mol. Struct. THEOCHEM* **2000**, 530, 183–200. [https://doi.org/10.1016/S0166-1280\(00\)00340-7](https://doi.org/10.1016/S0166-1280(00)00340-7).
